# Supplementary material
Source: HighWire-hosted journal article supplement (https://bmjopen.bmj.com/content/10/9/e036633)
Supplement: inline-supplementary-material-1 [file inline-supplementary-material-1.pdf]

---

**Online supplementary appendix 1. Medline Search Strategy example**


---

**Step Search Term**


---

- 1 exp primary health care/
- 2 Family practice/
- 3 exp general practice/
- 4 community health services/
- 5 exp emergency service, hospital/
- 6 Physicians, Primary Care/
- 7 Physicians, Family/
- 8 General Practitioners/
- 9 Reproductive health Services/
- 10 (general pract\$ or family pract\$ or GP or physician\$ or emergency department\$ or emergency room\$ or trauma care or "accident and emergency" or community).tw.
- 11 (("primary health care" or "primary healthcare" or family or community or practice\$ or "Reproductive health") adj (medic\$ or doctor\$ or physician\$ or health\$ or nurs\$)).tw.
- 12 (primary adj2 care).tw.
- 13 1 or 2 or 3 or 4 or 5 or 6 or 7 or 8 or 9 or 10 or 11 or 12
- 14 drugs, non-prescription/
- 15 "drug use".tw.
- 16 "drug abuse".tw.
- 17 "unhealthy drug use".tw.
- 18 drug misuse/
- 19 prescription drug misuse/
- 20 "drug addiction".tw.
- 21 drug dependence/
- 22 "illicit drugs".tw.
- 23 (drug adj3 (use\$ or abuse\$ or misuse\$ or addiction or dependence)).tw.
- 24 14 or 15 or 16 or 17 or 18 or 19 or 20 or 21 or 22 or 23
- 25 "marijuana".tw.
- 26 cannabis/
- 27 crack cocaine/
- 28 cocaine/
- 29 heroin/
- 30 opioids/
- 31 narcotics/
- 32 methamphetamine/
- 33 amphetamines/
- 34 Benzodiazepine/
- 35 "inhalant".tw.
- 36 Barbiturates/
- 37 hallucinogens/
- 38 Hypnotics/
- 39 sedatives/
- 40 "stimulant".tw.
- 41 "depressant".tw.
- 42 25 or 26 or 27 or 28 or 29 or 30 or 31 or 32 or 33 or 34 or 35 or 36 or 37 or 38 or 39 or 40 or 41
- 43 24 or 42

44 Counsel?ing/  
45 Psychotherapy, Brief/  
46 Interview, Psychological/  
47 Behavio?r Therapy/  
48 Cognitive Behavio?ral Therapy/  
49 Motivational Interviewing/  
50 "brief intervention".tw.  
51 "brief treatment".tw.  
52 "SBIRT".tw.  
53 "SBI".tw.  
54 ((brief or minimal or early or motivat\$) adj3 (treatment or intervention\$ or  
therap\$ or interview\$)).tw.  
55 44 or 45 or 46 or 47 or 48 or 49 or 50 or 51 or 52 or 53 or 54  
56 randomized controlled trial.pt.  
57 controlled clinical trial.pt.  
58 randomi\$.ab.  
59 placebo.ab.  
60 drug therapy.fs.  
61 randomly.ab.  
62 trial.ab.  
63 groups.ab.  
64 56 or 57 or 58 or 59 or 60 or 61 or 62 or 63  
65 (animals not (humans and animals)).sh.  
66 64 not 65  
67 13 and 43 and 55 and 66

---
